# Supplementary material for: Prognostic Value of MUC2 Expression in Colorectal Cancer: A Systematic Review and Meta-Analysis
Source: Hindawi journal article supplement (doi:10.1155/2018/6986870), 2018-06-05
Supplement: f1 [file 6986870.f1.pdf]

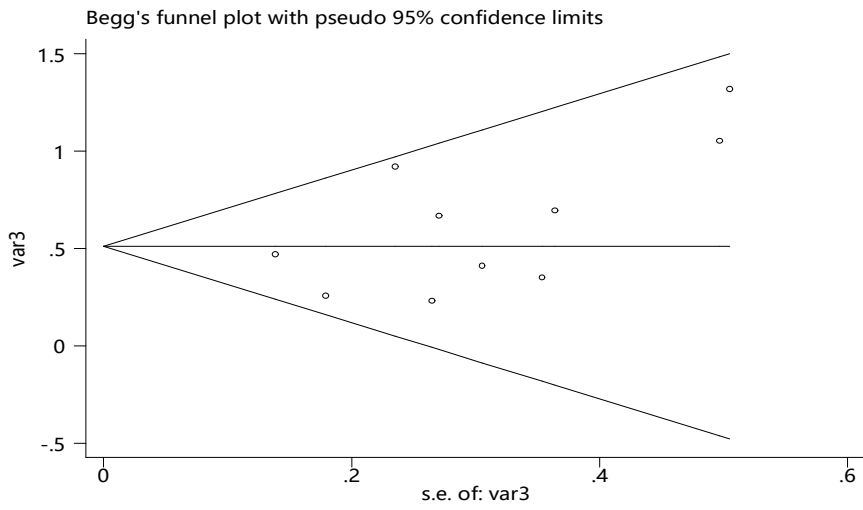

(a)

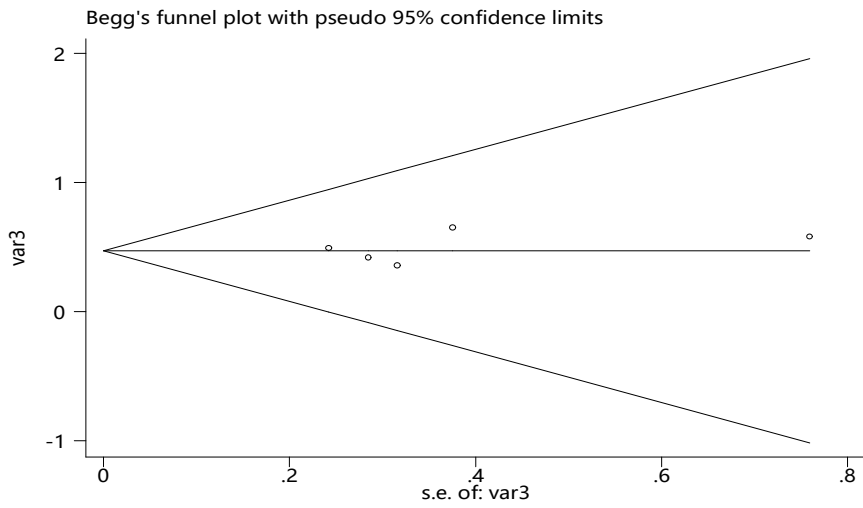

(b)

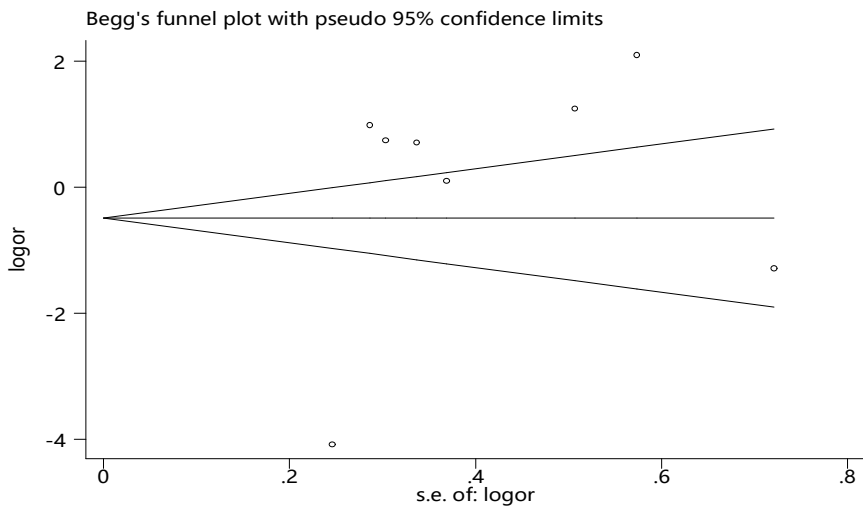

(c)

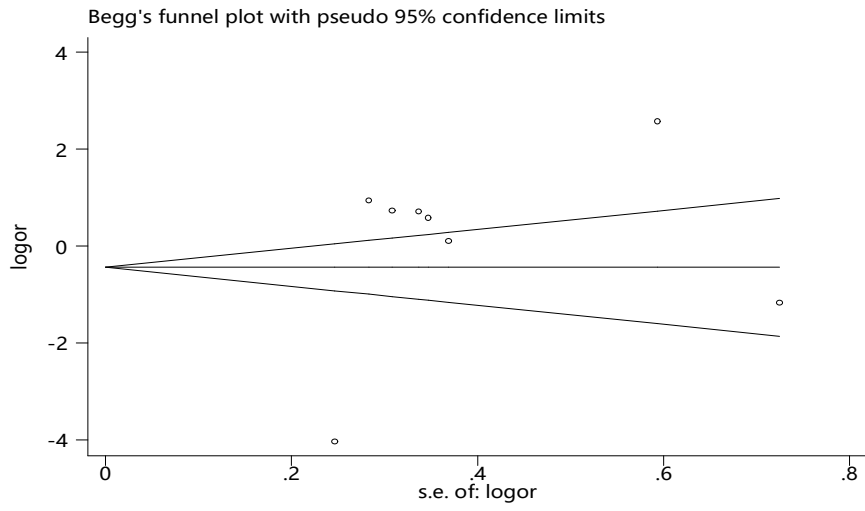

(d)

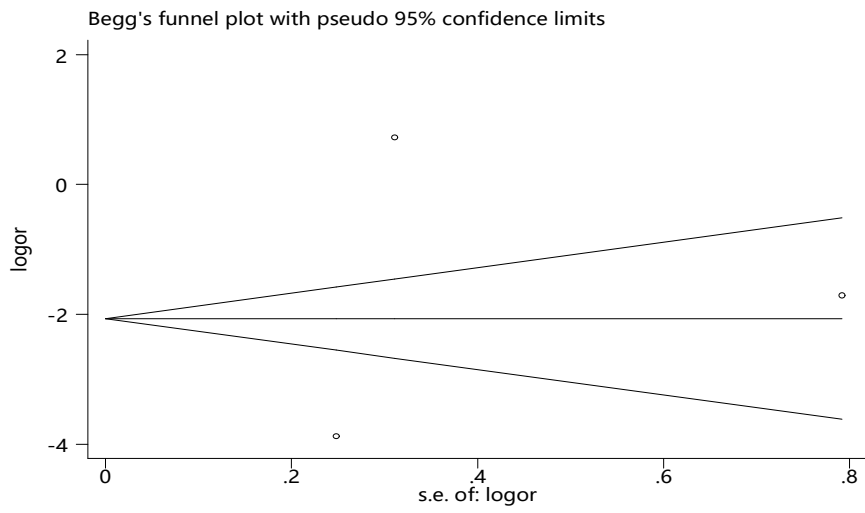

(e)

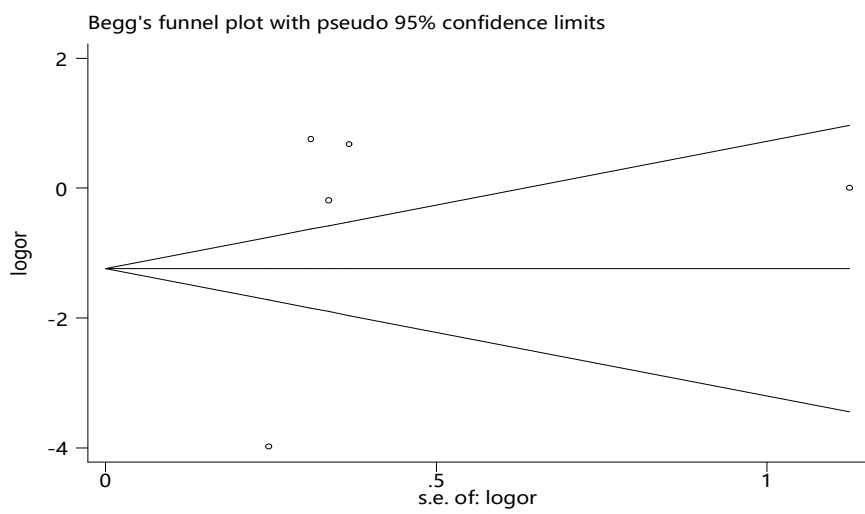

(f)

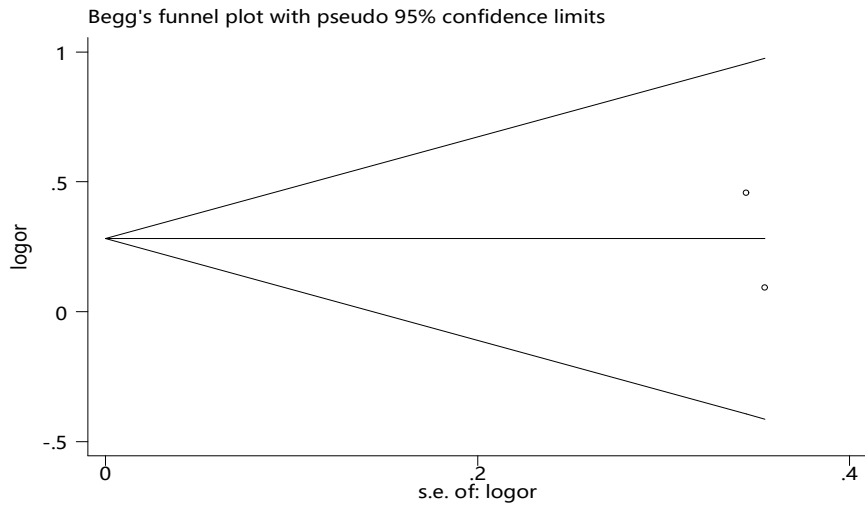

(g)

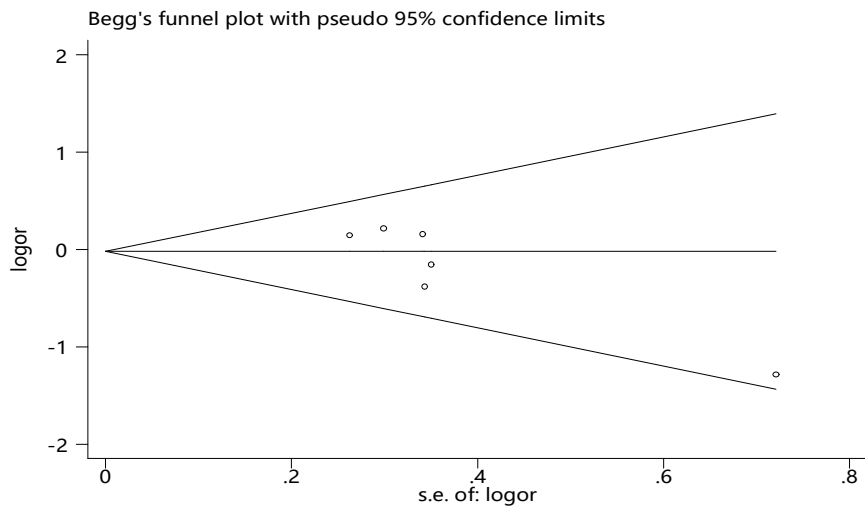

(h)

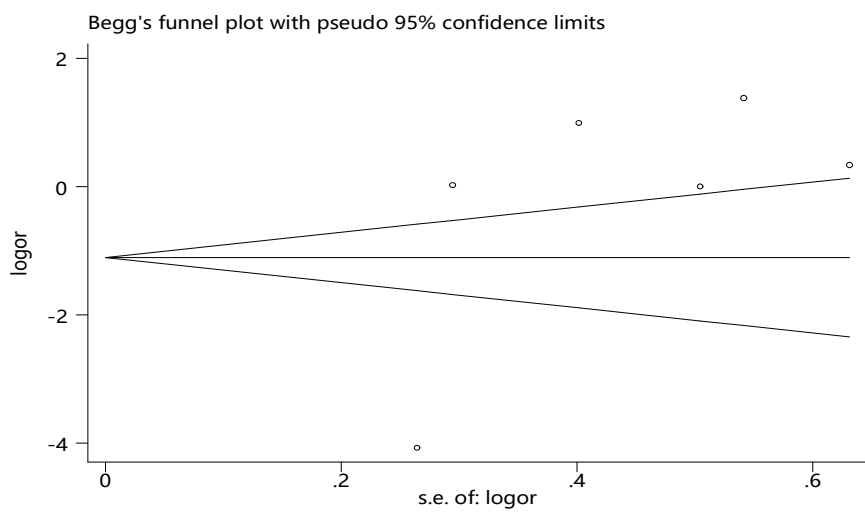

(i)

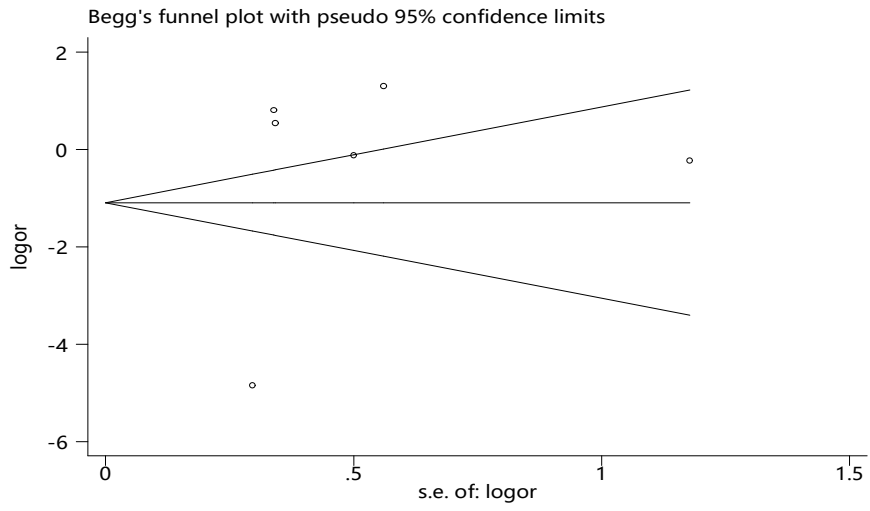

(j)

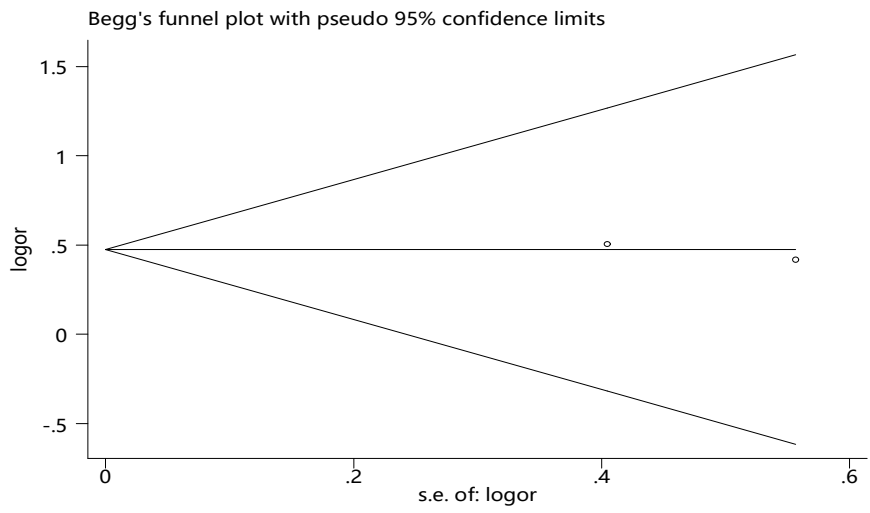

(k)
